# Supplementary material for: Cyclic nucleotide-gated ion channel gene family in rice, identification, characterization and experimental analysis of expression response to plant hormones, biotic and abiotic stresses
Source: PubMed Central journal article supplement (PMC4197254; doi:10.1186/1471-2164-15-853), 2014-10-04

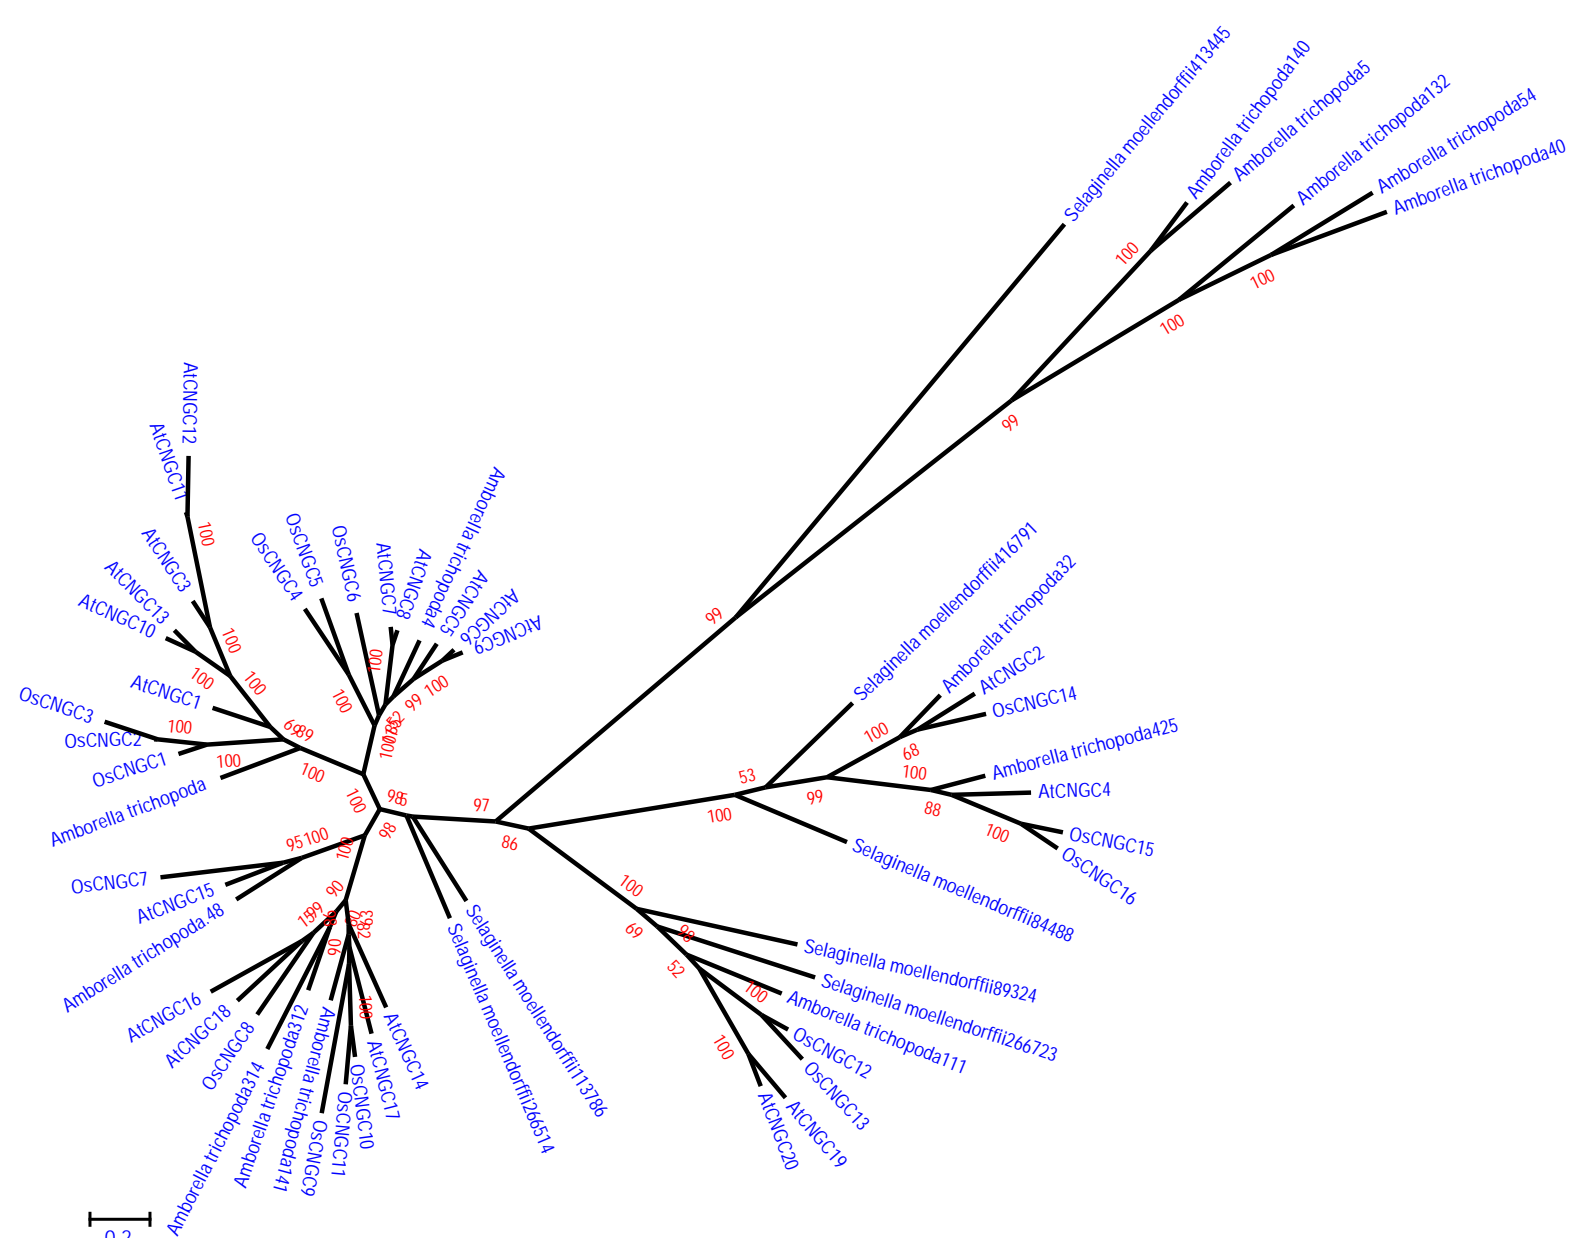

Supplement: 12864_2014_6538_MOESM8_ESM.pdf [file 12864_2014_6538_MOESM8_ESM.pdf]
